# Supplementary material for: Glucose-assisted synthesis of a magnetic monohydroxy aluminium oxide@carbon (γ-AlOOH/Fe3O4@C) nanocomposite as an innovative sorbent for extraction and pre-concentration of deferasirox present in plasma and urine samples
Source: Royal Society of Chemistry journal article supplement (doi:10.1039/d2nj04107c), 2022-11-16
Supplement: d2nj04107c1.pdf [file d2nj04107c1.pdf]

## Supporting Information

---

### **Glucose-assisted synthesis of magnetic monohydroxy aluminium oxide @carbon ( $\gamma$ -AlOOH/Fe<sub>3</sub>O<sub>4</sub>@C) nanocomposite as an innovative sorbent for extraction and pre-concentration of deferasirox from plasma and urine samples**

Payam Arabkhani <sup>a</sup> , Negar Sadegh, <sup>b</sup>, Mahmoud Shahamat <sup>a</sup>, Arash Asfaram <sup>\*a</sup>

<sup>a</sup> *Medicinal Plants Research Center, Yasuj University of Medical Sciences, Yasuj, Iran*

<sup>b</sup> *Department of Chemistry, Faculty of Sciences, Shahrekord University, P.O. Box 115, Shahrekord, Iran.*

---

---

\* Corresponding authors: E-mail address:  
[arash.asfaram@yums.ac.ir](mailto:arash.asfaram@yums.ac.ir) (A. Asfaram)

**Table S1.** Design matrix for the CCD.

| Independent variables             | Unit                  | Levels ( $\alpha = 2$ ) |                |                |            |           |
|-----------------------------------|-----------------------|-------------------------|----------------|----------------|------------|-----------|
|                                   |                       | $-\alpha$               | Low (-1)       | Center (0)     | High (+1)  | $+\alpha$ |
| (X <sub>1</sub> ) pH              | -                     | 3.0                     | 4.5            | 6.0            | 7.0        | 9.0       |
| (X <sub>2</sub> ) Sorbent mass    | mg                    | 4.0                     | 6.0            | 8.0            | 10         | 12        |
| (X <sub>3</sub> ) Ultrasound time | min                   | 3.0                     | 6.0            | 9.0            | 12         | 15        |
| (X <sub>4</sub> ) Eluent volume   | mL                    | 0.050                   | 0.125          | 0.200          | 0.275      | 0.350     |
| Run                               | Independent variables |                         |                |                | ER%<br>DEX |           |
|                                   | X <sub>1</sub>        | X <sub>2</sub>          | X <sub>3</sub> | X <sub>4</sub> |            |           |
| 1                                 | 6.0                   | 8.0                     | 9.0            | 0.050          | 46.63      |           |
| 2                                 | 6.0                   | 4.0                     | 9.0            | 0.200          | 63.39      |           |
| 3                                 | 7.5                   | 6.0                     | 12             | 0.125          | 72.33      |           |
| 4                                 | 7.5                   | 10                      | 12             | 0.275          | 90.54      |           |
| 5                                 | 7.5                   | 6.0                     | 6.0            | 0.275          | 75.52      |           |
| 6                                 | 7.5                   | 10                      | 12             | 0.125          | 86.52      |           |
| 7                                 | 7.5                   | 6.0                     | 6.0            | 0.125          | 50.24      |           |
| 8                                 | 4.5                   | 10                      | 6.0            | 0.275          | 77.13      |           |
| 9                                 | 4.5                   | 6.0                     | 6.0            | 0.275          | 62.38      |           |
| 10                                | 6.0                   | 8.0                     | 9.0            | 0.200          | 86.12      |           |
| 11                                | 6.0                   | 12                      | 9.0            | 0.200          | 99.56      |           |
| 12                                | 4.5                   | 10                      | 12             | 0.275          | 84.41      |           |
| 13                                | 6.0                   | 8.0                     | 9.0            | 0.200          | 85.30      |           |
| 14                                | 6.0                   | 8.0                     | 3.0            | 0.200          | 64.99      |           |
| 15                                | 4.5                   | 10                      | 6.0            | 0.125          | 57.57      |           |
| 16                                | 7.5                   | 10                      | 6.0            | 0.275          | 85.47      |           |
| 17                                | 6.0                   | 8.0                     | 9.0            | 0.350          | 76.13      |           |
| 18                                | 7.5                   | 10                      | 6.0            | 0.125          | 74.25      |           |
| 19                                | 6.0                   | 8.0                     | 9.0            | 0.200          | 84.24      |           |
| 20                                | 6.0                   | 8.0                     | 9.0            | 0.200          | 82.69      |           |
| 21                                | 6.0                   | 8.0                     | 9.0            | 0.200          | 87.08      |           |
| 22                                | 6.0                   | 8.0                     | 9.0            | 0.200          | 86.61      |           |
| 23                                | 9.0                   | 8.0                     | 9.0            | 0.200          | 55.50      |           |
| 24                                | 3.0                   | 8.0                     | 9.0            | 0.200          | 33.72      |           |
| 25                                | 4.5                   | 6.0                     | 12             | 0.125          | 51.41      |           |
| 26                                | 4.5                   | 10                      | 12             | 0.125          | 79.52      |           |
| 27                                | 4.5                   | 6.0                     | 12             | 0.275          | 71.18      |           |
| 28                                | 4.5                   | 6.0                     | 6.0            | 0.125          | 32.52      |           |
| 29                                | 7.5                   | 6.0                     | 12             | 0.275          | 78.11      |           |
| 30                                | 6.0                   | 8.0                     | 15             | 0.200          | 94.14      |           |

**Table S2.** Analysis of variance (ANOVA) for UA-DSPME of DFX.

| Source                          | SS               | DF          | MS                   | F-value                       | P-value                        |                       |
|---------------------------------|------------------|-------------|----------------------|-------------------------------|--------------------------------|-----------------------|
| Model                           | 8498             | 14          | 607                  | 69.03                         | < 0.0001                       |                       |
| X <sub>1</sub>                  | 821.6            | 1           | 822                  | 93.43                         | < 0.0001                       |                       |
| X <sub>2</sub>                  | 1909             | 1           | 1909                 | 217.1                         | < 0.0001                       |                       |
| X <sub>3</sub>                  | 1030             | 1           | 1030                 | 117.2                         | < 0.0001                       |                       |
| X <sub>4</sub>                  | 1341             | 1           | 1341                 | 152.5                         | < 0.0001                       |                       |
| X <sub>1</sub> X <sub>2</sub>   | 26.42            | 1           | 26.42                | 3.005                         | 0.1035                         |                       |
| X <sub>1</sub> X <sub>3</sub>   | 13.88            | 1           | 13.88                | 1.578                         | 0.2283                         |                       |
| X <sub>1</sub> X <sub>4</sub>   | 48.23            | 1           | 48.23                | 5.485                         | 0.0334                         |                       |
| X <sub>2</sub> X <sub>3</sub>   | 2.102            | 1           | 2.102                | 0.239                         | 0.6319                         |                       |
| X <sub>2</sub> X <sub>4</sub>   | 105.1            | 1           | 105.1                | 11.95                         | 0.0035                         |                       |
| X <sub>3</sub> X <sub>4</sub>   | 165.5            | 1           | 165.5                | 18.82                         | 0.0006                         |                       |
| X <sub>1</sub> <sup>2</sup>     | 2500             | 1           | 2500                 | 284.3                         | < 0.0001                       |                       |
| X <sub>2</sub> <sup>2</sup>     | 3.006            | 1           | 3.006                | 0.342                         | 0.5675                         |                       |
| X <sub>3</sub> <sup>2</sup>     | 17.93            | 1           | 17.93                | 2.039                         | 0.1738                         |                       |
| X <sub>4</sub> <sup>2</sup>     | 786.5            | 1           | 786.5                | 89.44                         | < 0.0001                       |                       |
| Residual                        | 131.9            | 15          | 8.793                |                               |                                |                       |
| Lack of Fit                     | 118.4            | 10          | 11.84                | 4.391                         | 0.0581                         |                       |
| Pure Error                      | 13.48            | 5           | 2.697                |                               |                                |                       |
| Corr. Total                     | 8630             | 29          |                      |                               |                                |                       |
| <b>Model Summary Statistics</b> |                  |             |                      |                               |                                |                       |
| <b>Response</b>                 | <b>Std. Dev.</b> | <b>CV %</b> | <b>R<sup>2</sup></b> | <b>Adjusted-R<sup>2</sup></b> | <b>Predicted-R<sup>2</sup></b> | <b>Adeq Precision</b> |
| <b>ER%</b>                      | 2.965            | 4.090       | 0.9847               | 0.9705                        | 0.9187                         | 34.07                 |

SS: Sum of squares

DF: Degree of freedom

MS: Mean square

**Table S3.** Analytical parameters of established UA-DSPME/HPLC–UV method for DFX in real samples.

| <b>Quantitative analysis</b>                         | <b>Values</b> |
|------------------------------------------------------|---------------|
| Sample volume (mL)                                   | 15            |
| Elution solvent (mL)                                 | 0.2           |
| Linear range (ng mL <sup>-1</sup> )                  | 10-3500       |
| Coefficients of determination (R <sup>2</sup> )      | 0.9938        |
| Limit of detections (LOD) (ng mL <sup>-1</sup> )     | 0.163         |
| limit of quantification (LOQ) (ng mL <sup>-1</sup> ) | 5.421         |
| Preconcentration factor                              | 75            |
| Enrichment factor                                    | 128.85        |
| Precision (RSD, %)                                   | 2.09-5.22     |

**Table S4.** Sorption isotherm parameters of DFX by  $\gamma$ -AlOOH/Fe<sub>3</sub>O<sub>4</sub>@C in various isotherm models.

| Isotherm                                                                                                   | Plot                    | Parameters                   | Value       |
|------------------------------------------------------------------------------------------------------------|-------------------------|------------------------------|-------------|
| <p style="text-align: center;"><b>Langmuir</b></p> $\frac{C_e}{q_e} = \frac{1}{Q_m k_L} + \frac{C_e}{Q_m}$ | $C_e/q_e$ vs. $C_e$     | $Q_m$ (mg g <sup>-1</sup> )  | 40.28       |
|                                                                                                            |                         | $K_L$ (L mg <sup>-1</sup> )  | 1.519       |
|                                                                                                            |                         | $R^2$                        | 0.996       |
|                                                                                                            |                         | $R_L=1/(1+(K_L \times C_0))$ | 0.013-0.568 |
| <p style="text-align: center;"><b>Freundlich</b></p> $\ln q_e = \ln K_F + \frac{1}{n} \ln C_e$             | $\ln q_e$ vs. $\ln C_e$ | 1/n                          | 0.467       |
|                                                                                                            |                         | $K_F$ (L mg <sup>-1</sup> )  | 3.257       |
|                                                                                                            |                         | $R^2$                        | 0.975       |

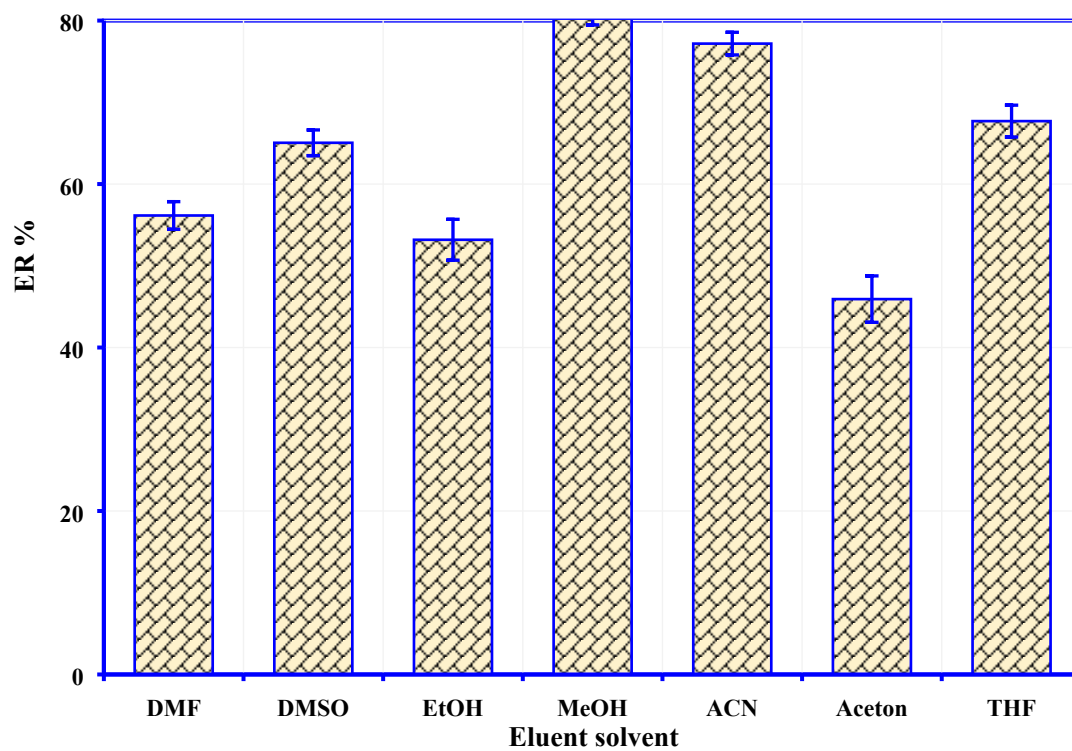

**Fig. S1.** Eluents types effect to extraction recovery (ER%) of DFX by  $\gamma$ -AlOOH/Fe<sub>3</sub>O<sub>4</sub>@C.

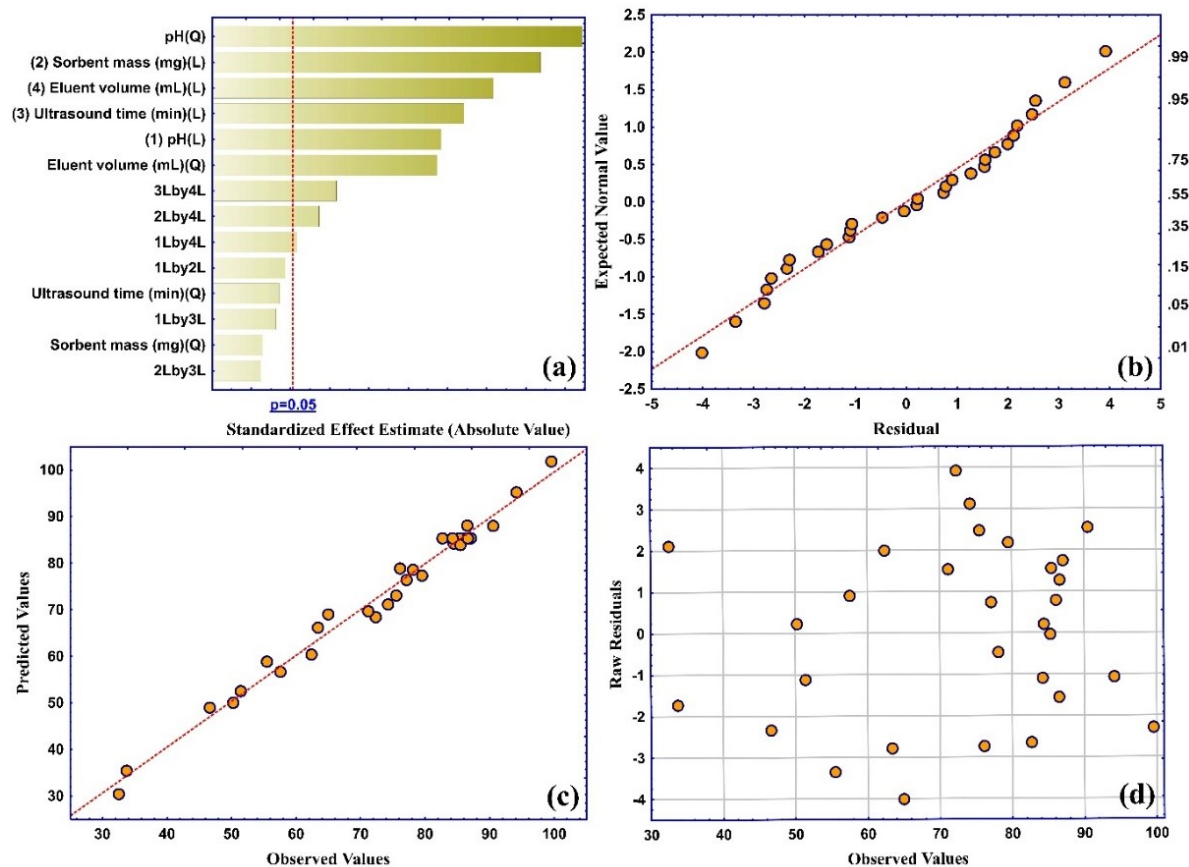

**Fig. S2.** (a) Pareto chart of standardized effects for variables ( $p:0.05$ ), (b) normal plot of residuals, (c) observed versus predicted plot, and (d) observed values versus raw residuals for the ER% of DFX in predicted model.

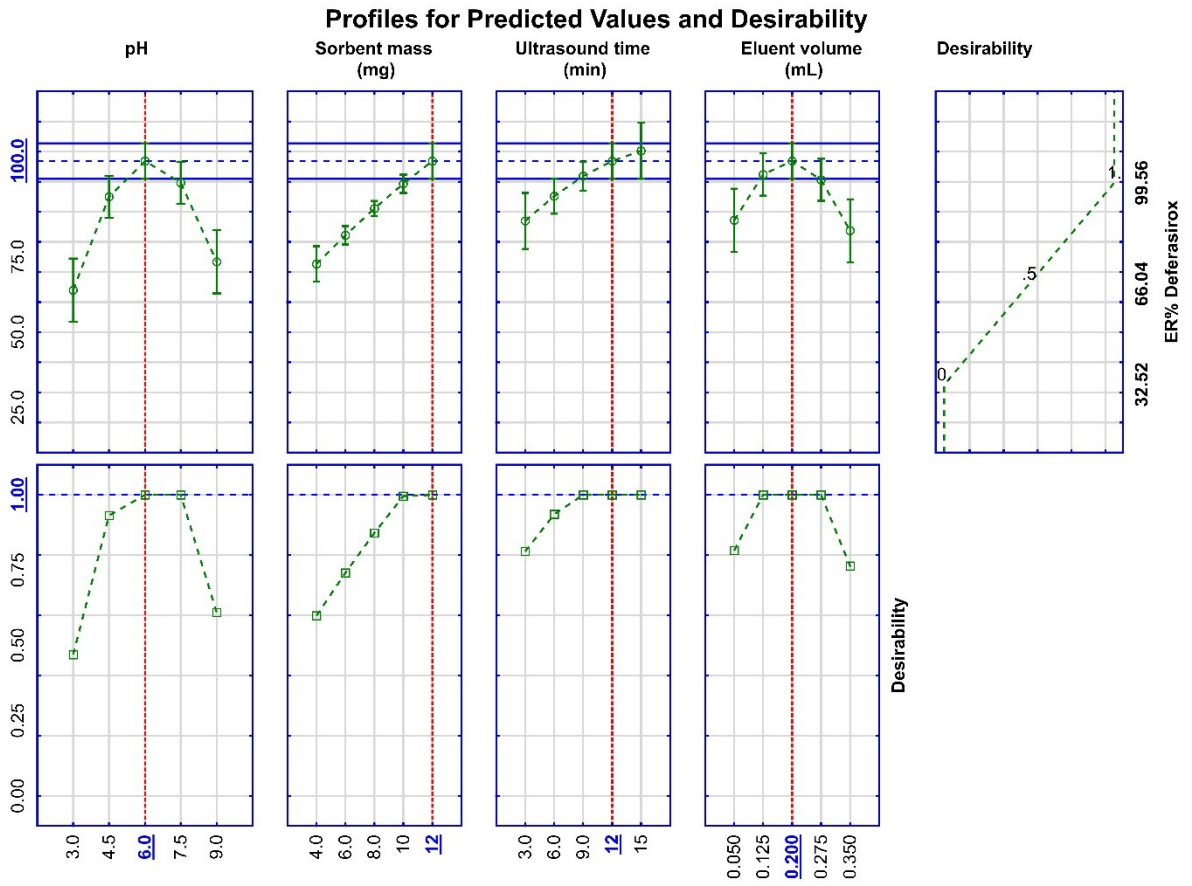

**Fig. S3.** Profile of predicted values of independent variables along with desirability. The dotted red line indicates the optimal value of each variable.



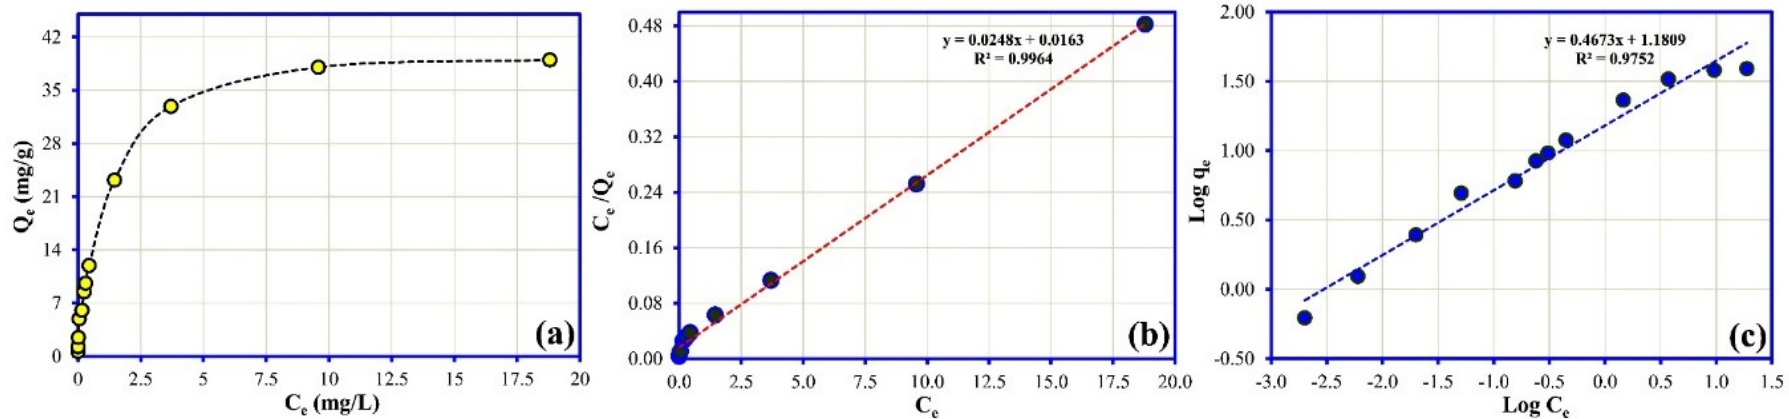

**Figure S4.** Linear fits of the sorption of DFX for (a) experimental, (b) Langmuir, and (c) Freundlich isotherm models.

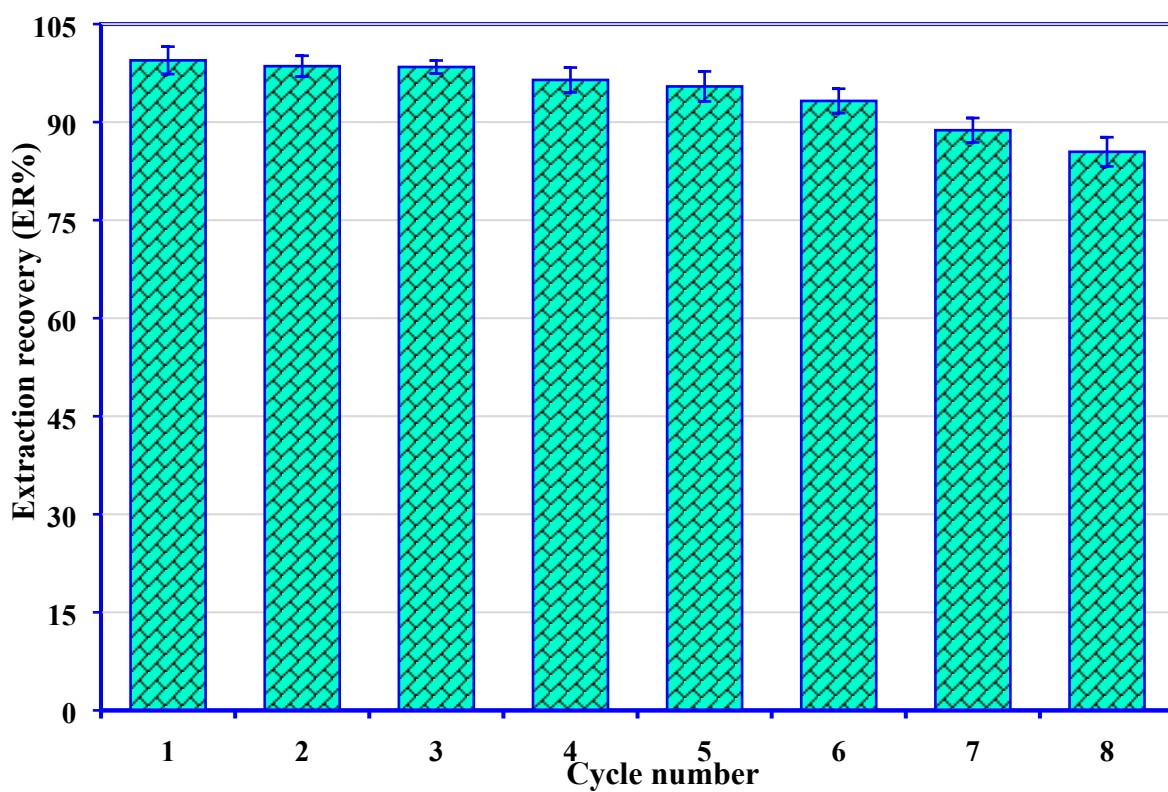

Fig. S5. Extraction recovery of DFX by  $\gamma$ -AlOOH/Fe<sub>3</sub>O<sub>4</sub>@C in reusability test.
